# Supplementary material for: Polydopamine-coated cellulose microfibrillated membrane as high performance lithium-ion battery separator
Source: Royal Society of Chemistry journal article supplement (doi:10.1039/c3ra45879b), 2013-11-28
Supplement: c3ra45879b.pdf [file c3ra45879b.pdf]

## Supporting Information

### Polydopamine-Coated Cellulose Microfibrillated Membrane as High Performance Lithium-ion Battery Separator

Quan Xu<sup>a,b</sup>, Qingshan Kong<sup>a,\*</sup>, Zhihong Liu<sup>a</sup>, Jianjun Zhang<sup>a</sup>, Xuejiang Wang<sup>a</sup>,  
Rongzhan Liu<sup>b</sup>, Liping Yue<sup>a</sup>, Guanglei Cui<sup>a,\*</sup>

<sup>a</sup>*Qingdao Key Lab of Solar Utilization and Energy Storage Technology, Qingdao Institute of Bioenergy and Bioprocess Technology, Chinese Academy of Sciences, Qingdao 266101, China*

<sup>b</sup>*College of Chemical & Environmental Engineering, Qingdao University, Qingdao 266071, China*

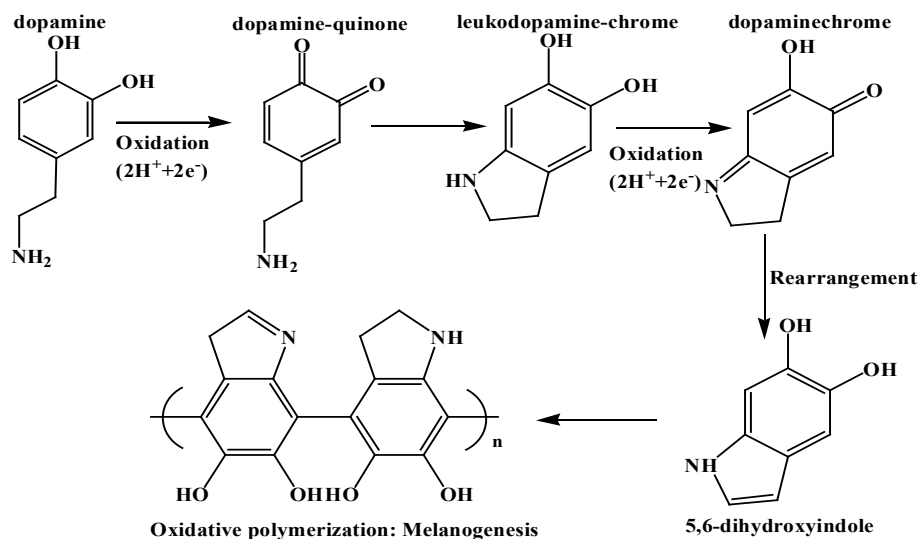

**Figure S1.** Suggested mechanism for dopamine polymerization by alkaline pH-induced oxidation.

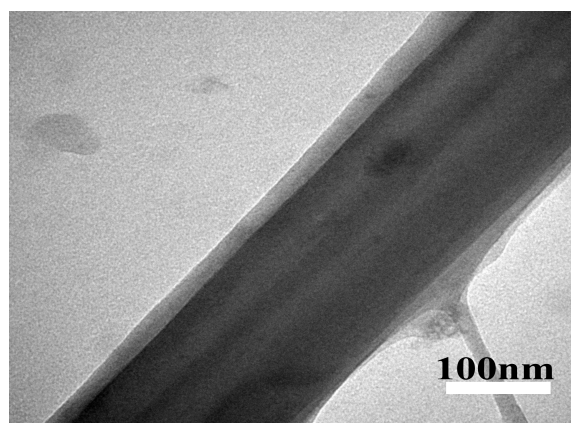

**Figure S2.** TEM image of the polydopamine-coated cellulose fiber.

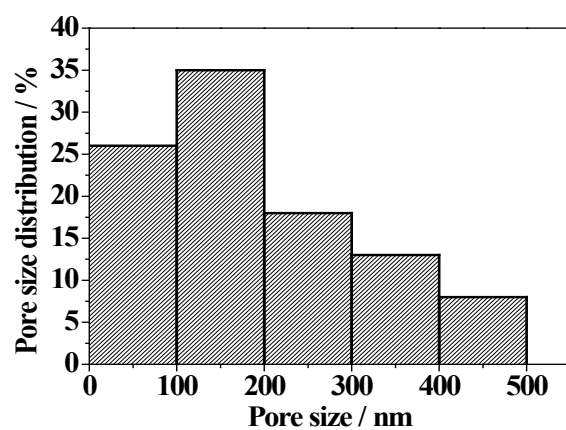

**Figure S3.** Pore distribution of CPD separator.

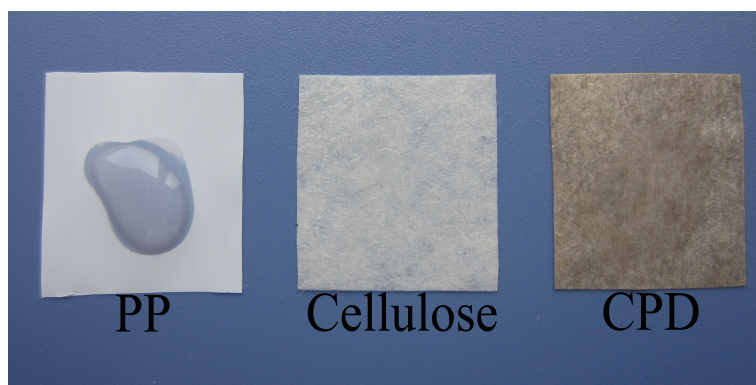

**Figure S4.** Photograph showing liquid electrolyte wettability (1 M LiPF<sub>6</sub> in EC/DMC (1/1, v/v)).

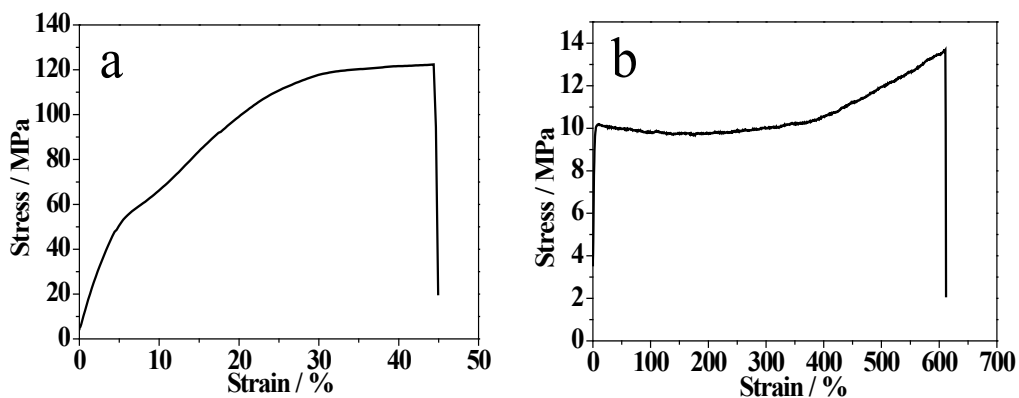

**Figure S5.** Stress-strain curves of PP separator (a) at machine direction and (b) and transverse direction.

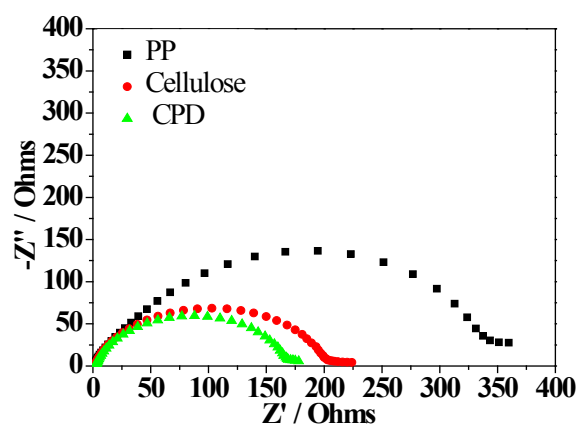

**Figure S6.** Nyquist plots of Li/electrolyte-soaked separator/Li cells at room temperature.

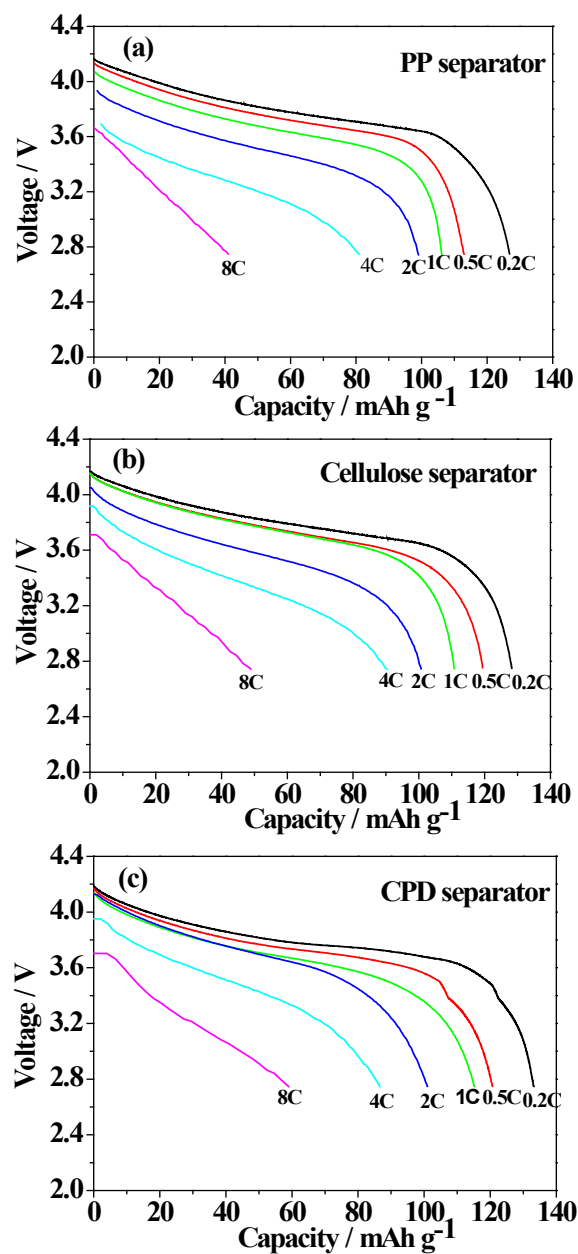

**Figure S7.** Discharging profiles of cells using (a) PP separator, (b) cellulose separator, (c) CPD separator at different current densities.

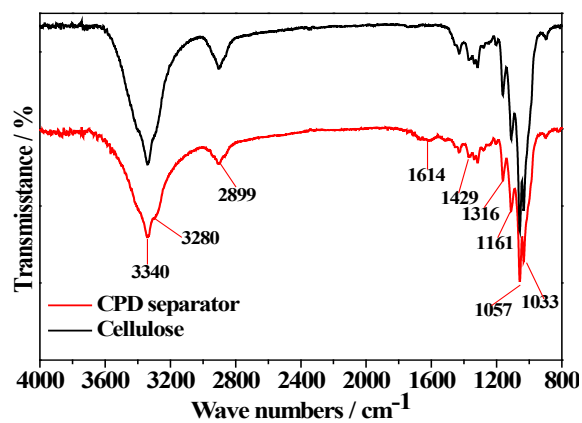

**Figure S8.** FT-IR spectra of CPD separator and cellulose separator.

Compared with that of cellulose separator, the FT-IR spectra of CPD separator has two new peaks at  $3280\text{ cm}^{-1}$  and  $1614\text{ cm}^{-1}$  which could be assigned to the stretching vibration of  $\text{-NH}_2$ . Therefore, FT-IR spectrum provides an additional evidence for the formation of polydopamine film on the cellulose.
